# Supplementary material for: Thermal Regime of High Arctic Tundra Ponds, Nanuit Itillinga (Polar Bear Pass), Nunavut, Canada
Source: Copernicus journal article supplement (doi:10.5194/hess-2023-297), 2024-02-28
Supplement: Supplementary file 1 [file hess-2023-297-supplement.pdf]

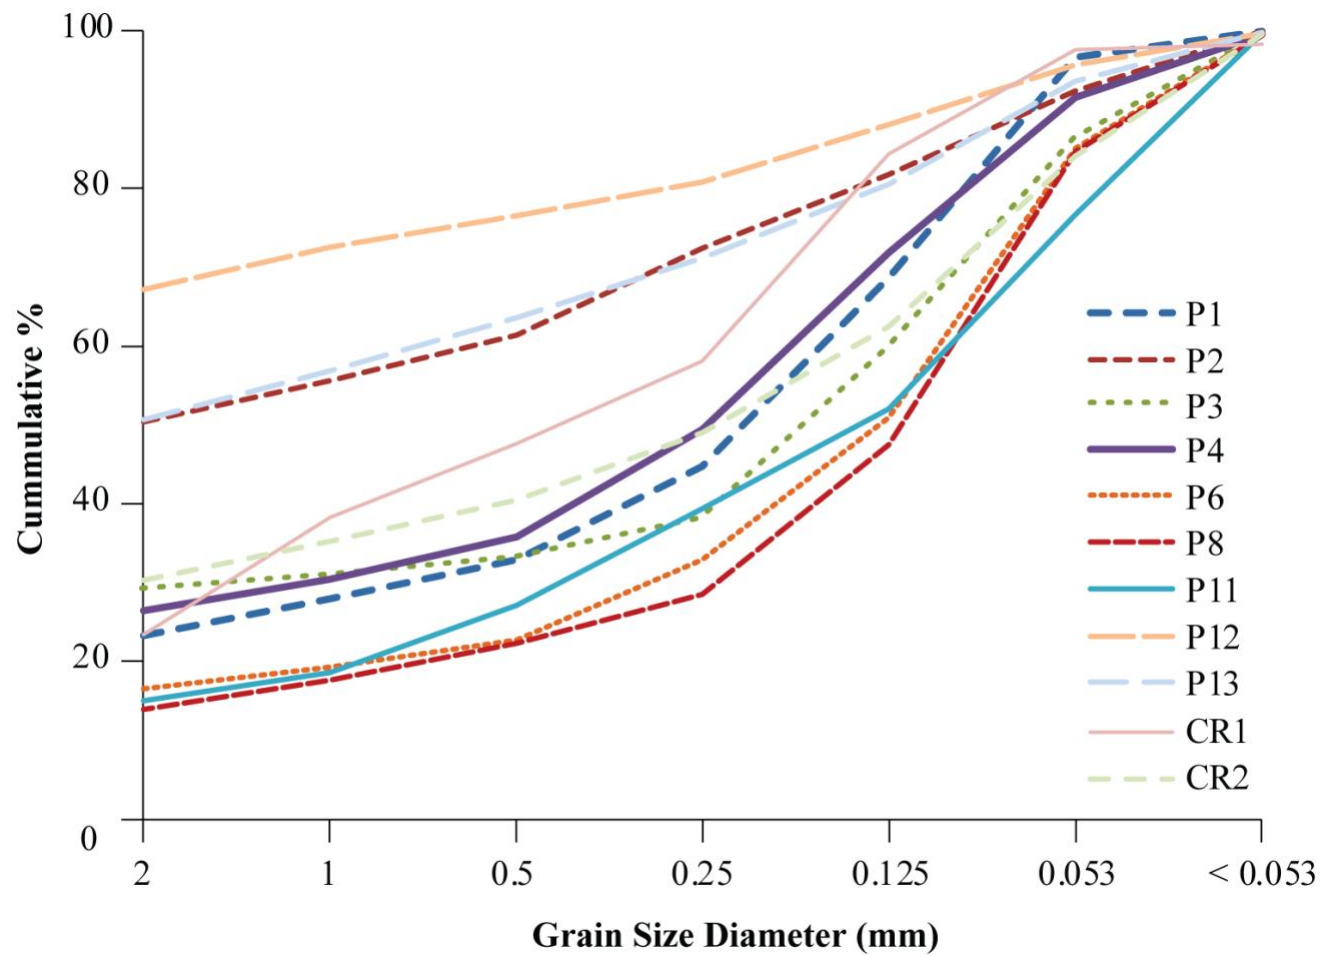

Supplementary Figure 1. Grain size analysis of selected centrally located ponds at PBP. Pond sediments reported here were collected in 2009 (see Croft 2011).
